# Supplementary material for: Study of data center communication network topologies using complex network propagation model
Source: Frontiers journal article supplement (doi:10.3389/fphy.2023.1174099), 2023-05-09
Supplement: Table_1.DOCX [file Table_1.DOCX]

| Table : ranges for each variable in Leaf-spine network | | | |
| --- | --- | --- | --- |
| ID | Description | Code | Value Range |
| 1 | Probability of the device being infected | P | [0,1] |
| 2 | Access of the propagation source | Access | Spine/leaf/server |
| 3 | Count of the propagation sources | Count | 1,3,5 |
| 4 | Data center network topology | Spine_leaf | - |
| 5 | Data center network topological parameter | Spine | 18 |
| Leaf | 24,32,48 |
| Server | 48,36,24 |

| Table : ranges for each variable in Fat-tree network | | | |
| --- | --- | --- | --- |
| ID | Description | Code | Range of values |
| 1 | Probability of the device being infected | P | [0,1] |
| 2 | Access of the propagation source | Access | Agg,core,  server |
| 3 | Count of the propagation sources | Count | 1,3,5 |
| 4 | Data center network topology | Fat_tree | - |
| 5 | Data center network topological parameter | N_Fat_tree | 10,11,12,  13,14,15 |

| Table : ranges for each variable in Bcube | | | | | |
| --- | --- | --- | --- | --- | --- |
| ID | Name | Code | | Value Range | |
| 1 | Probability of the device being infected | | P | | [0,1] | |
| 2 | Access of the propagation source | | Access | | Layer/  server | |
| 3 | Count of propagation sources | | Count | | 1,3,5 | |
| 4 | Data center network topology | | Bcube | | - | |
| 5 | Data center network topological parameter | | n_Bcube | |  | |
| k_Bcube | |  | |
